# Supplementary material for: Molecular interactions of organic molecules at the air/water interface investigated by sum frequency generation vibrational spectroscopy
Source: Royal Society of Chemistry journal article supplement (doi:10.1039/c6cp07827c), 2017-01-01
Supplement: c6cp07827c1.pdf [file c6cp07827c1.pdf]

# Molecular Interactions of Organic Molecules at the Air/Water Interface Investigated by Sum Frequency Generation Vibrational Spectroscopy

Wenting Wang,<sup>1,2</sup> Shuji Ye,<sup>1,2,\*</sup>

<sup>1</sup>Hefei National Laboratory for Physical Sciences at the Microscale, and Department of Chemical Physics, University of Science and Technology of China, Hefei, Anhui, P. R. China 230026

## 1. Spectral fitting of SFG-VS Signal

The intensity of the sum-frequency radiation is proportional to the square of the effective second-order susceptibility, which has been introduced in plenty of studies.<sup>1-</sup>

3

$$I(\omega_{SFG}) \propto |\chi_{eff}^{(2)}|^2 I_1(\omega_{Vis}) I_2(\omega_{IR}) \quad (S1)$$

$\chi_{eff}^{(2)}$  can be expressed as the sum of resonant and nonresonant components,  $\chi_R^{(2)}$  and  $\chi_{NR}^{(2)}$ . And the frequency dependence of  $\chi_{eff}^{(2)}$  is described by eq. (S2).

$$\chi_{eff}^{(2)}(\omega) = \chi_{NR}^{(2)} + \sum_v \frac{A_v}{\omega - \omega_v + i\Gamma_v} \quad (S2)$$

$A_v$ ,  $\omega_v$ , and  $\Gamma_v$  are the amplitude of the SFG transition moment, frequency, and the line width of the transition, respectively.  $A_v$  could be either positive or negative depending on the phase of the vibrational mode.  $A_v$ ,  $\omega_v$ , and  $\Gamma_v$  can be extracted by fitting the spectrum.

## 2. The ssp and ppp spectra of four dibutyl ester molecules at the air/water interface at SP=5 and 10 mN/m

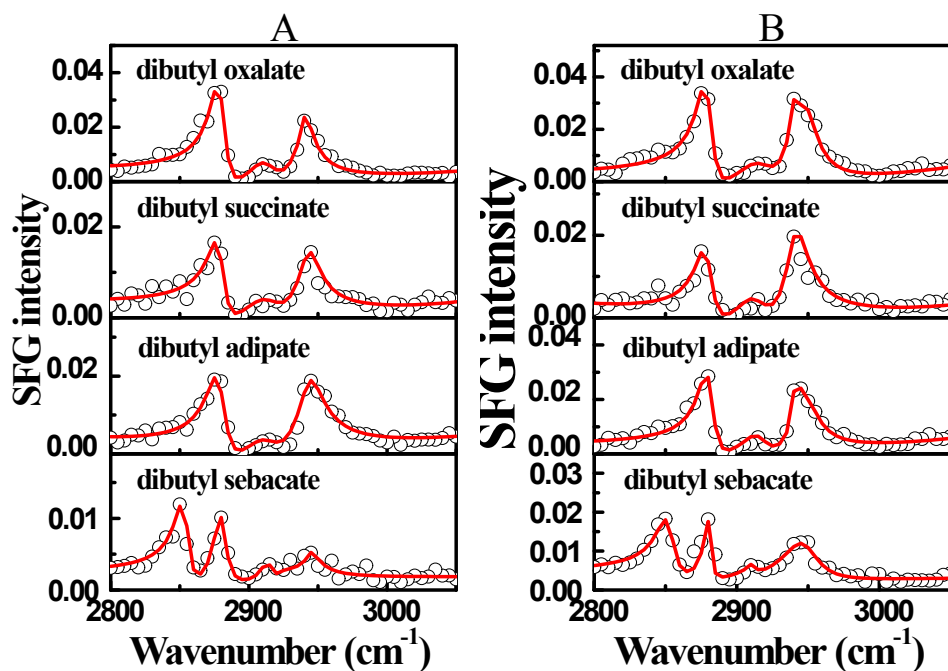

Figure S1. The ssp spectra of four dibutyl ester molecules at the air/water interface. A) at SP=5 mN/m, B) at SP=10 mN/m

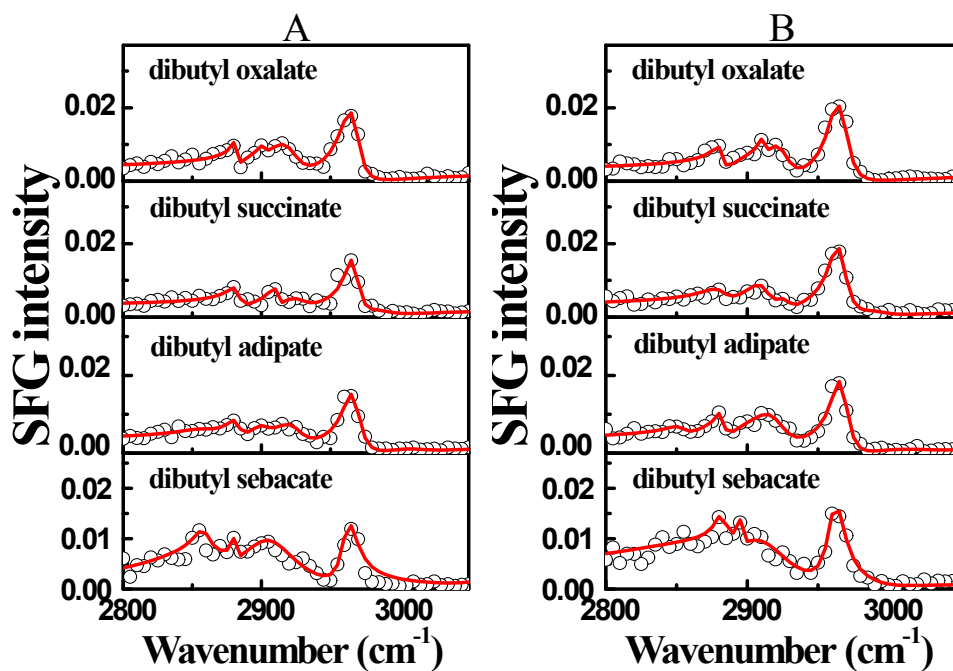

Figure S2. The ppp spectra of four dibutyl ester molecules at the air/water interface. A) at SP=5 mN/m, B) at SP=10 mN/m.

3. The calculated intensity ratio of  $\chi_{ppp}^{(2)}(CH_3, as) / \chi_{ssp}^{(2)}(CH_3, ss)$  as a function of the tilt angle.

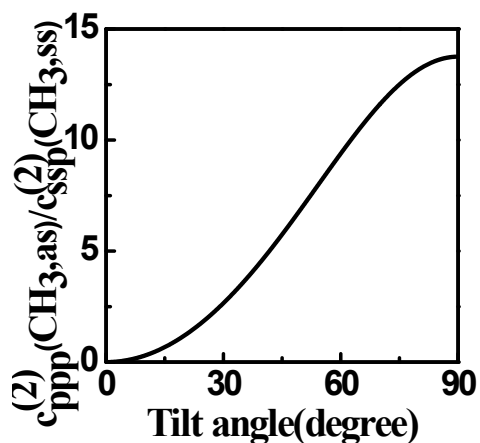

Figure S3. The calculated intensity ratio of  $\chi_{ppp}^{(2)}(CH_3,as)/\chi_{ssp}^{(2)}(CH_3,ss)$  as a function of the tilt angle.

4. The 45°76°P spectra of four dibutyl ester molecules at the air/water interface at SP=5 & 10 mN/m

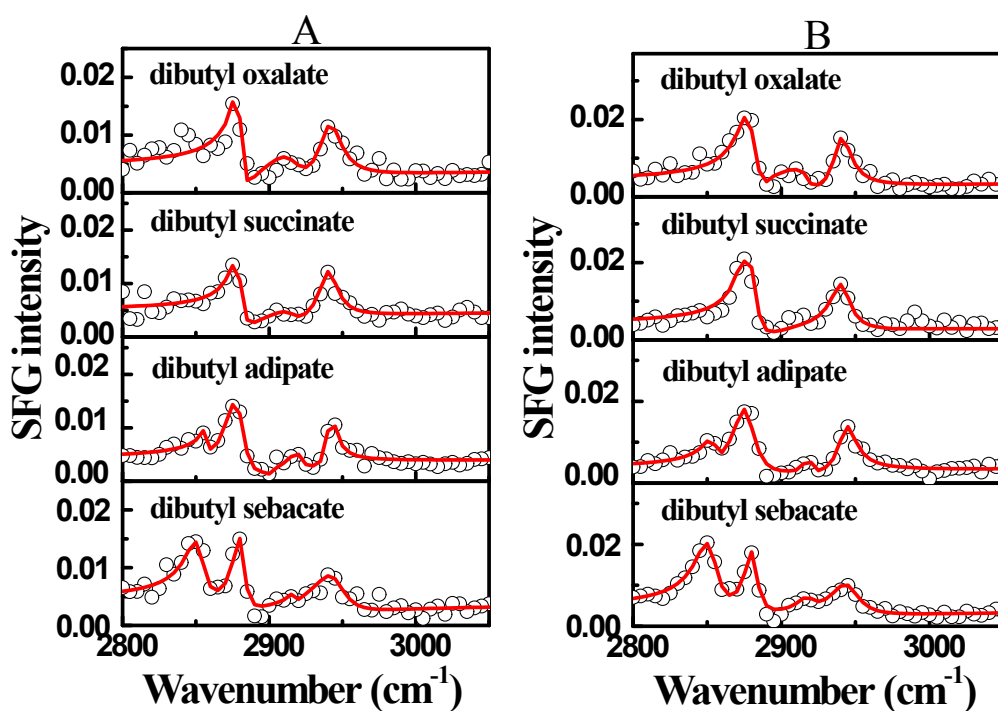

Figure S4.  $45^\circ/76^\circ\text{P}$  spectra of four dibutyl ester molecules at the air/water interface. A) at  $\text{SP}=5\text{ mN/m}$ ; B) at  $\text{SP}=10\text{ mN/m}$

**4. SFG ssp spectra of DBP/PVC (a) and DEP/PVC (b) samples taken from reference 4.**

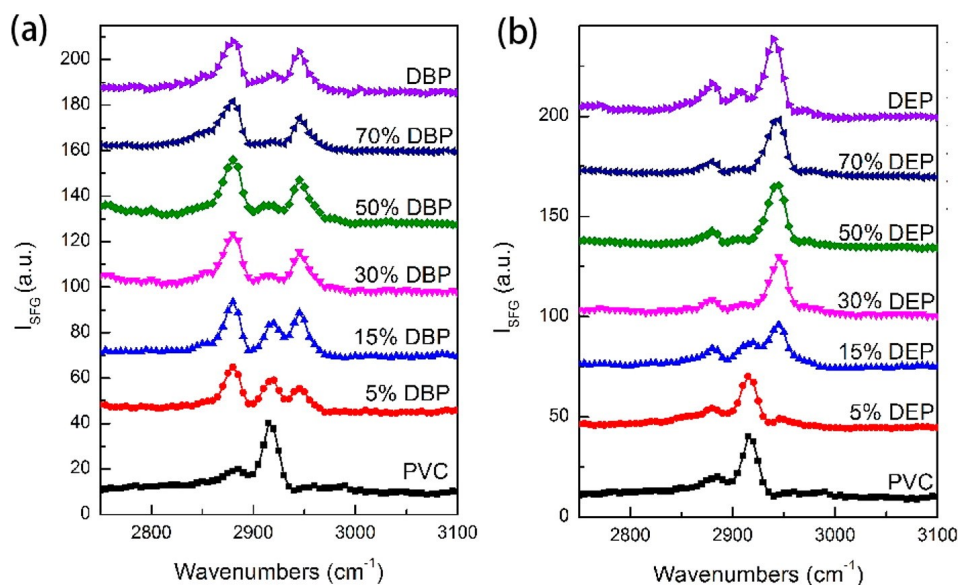

Figure S5. SFG ssp spectra of DBP/PVC (a) and DEP/PVC (b) samples with different phthalate bulk concentrations. (Figure S5 reproduced with permission from *Langmuir*, 2013,29 (12), 4008-4018, Copyright 2013, Am. Chem. Soc.)

**5. SFG ssp spectra of pure PVC, TBAC, and PVC-TBAC hybrid films with various bulk TBAC concentrations taken from reference 5.**

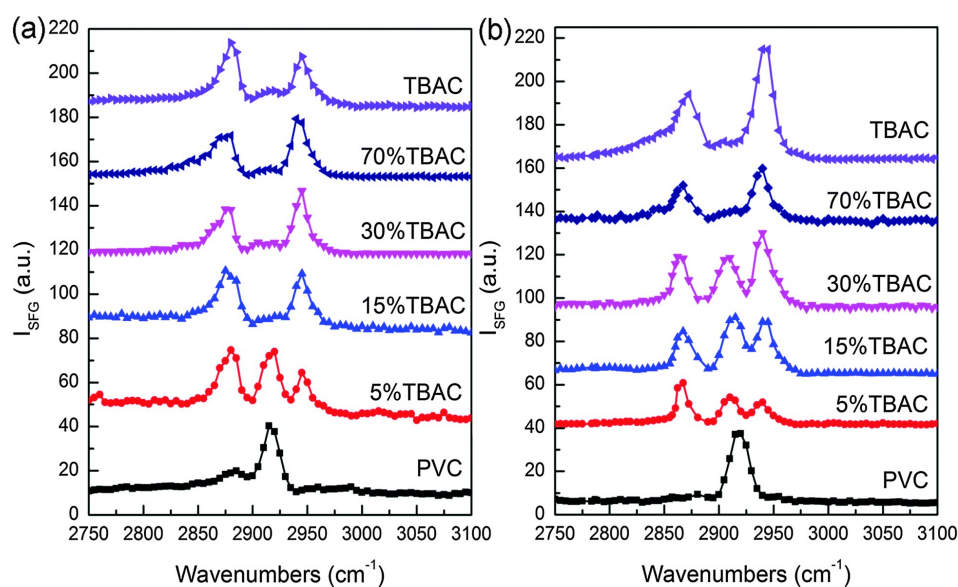

Figure S6. SFG ssp spectra of pure PVC, TBAC, and PVC-TBAC hybrid films with various bulk TBAC concentrations before (a) and after (b) water contact. (Figure S6 reproduced with permission from *Phys. Chem. Chem. Phys.*, 2015, 17(6), 4472-4482, Copyright 2015, Roy. Soc. Chem.)

## References

- 1 E. T. Castellana and P. S. Cremer, *Surf.Sci.Rep.*, 2006, **61**, 429-444.
- 2 S. Gopalakrishnan, D. Liu, H. C. Allen, M. Kuo and M. J. Shultz, *Chem. Rev.*, 2006, **106**, 1155-1175.
- 3 A. G. Lambert, P. B. Davies and D. J. Neivandt, *Appl. Spectrosc.Rev.*, 2005, **40**, 103-145.
- 4 X. Zhang, C. Zhang, J. M. Hankett and Z.Chen, *Langmuir*, 2013, **29**, 4008-4018.
- 5 X. Zhang, Y. Li, J. M. Hankett and Z. Chen, *Phys. Chem. Chem. Phys.*, 2015, **17**, 4472-4482.
